# Supplementary material for: Porous, robust, thermally stable, and flame retardant nanocellulose/polyimide separators for safe lithium-ion batteries
Source: Royal Society of Chemistry journal article supplement (doi:10.1039/d3ta05148j), 2023-01-01
Supplement: d3ta05148j1.pdf [file d3ta05148j1.pdf]

## **Porous, Robust, Thermal Stable, and Flame Retardant Nanocellulose/Polyimide Separators for Safe Lithium-Ion Batteries**

Yi Liu<sup>1†</sup>, Chao Li<sup>2†</sup>, Chunxing Li<sup>1†</sup>, Linhe Xu<sup>1</sup>, Shuang Zhou<sup>1</sup>, Ze Zhang<sup>1</sup>, Junxian Zhang<sup>1</sup>, Das Soham<sup>3</sup>, Rong Fan<sup>1</sup>, Hao Liu<sup>1</sup>, Gang Chen<sup>1</sup>, Yuanyuan Li<sup>4</sup>, Tong Ling<sup>5</sup>, Zhipeng Li<sup>6</sup>, Jinsong Tao<sup>1\*</sup>, and Jiayu Wan<sup>2\*</sup>

<sup>1</sup> State Key Lab of Pulp and Paper Engineering, South China University of Technology, Guangzhou, 510640, China, Email: [jstao@scut.edu.cn](mailto:jstao@scut.edu.cn)

<sup>2</sup> Global Institute of Future Technology, Shanghai Jiaotong University, Shanghai, 200240, China, Email: [wanyj@sjtu.edu.cn](mailto:wanyj@sjtu.edu.cn)

<sup>3</sup> Department of Natural and Applied Sciences, Duke Kunshan University, Jiangsu, 215316, China

<sup>4</sup> Department of Fiber and Polymer Technology, Wallenberg Wood Science Center, KTH Royal Institute of Technology, 10044, Sweden

<sup>5</sup> School of Chemistry, Chemical Engineering and Biotechnology, Nanyang Technological University, Singapore 637457, Singapore

<sup>6</sup> Institute of Flexible Electronics, Northwestern Polytechnical University, Xi'an, 710072, China

\* Corresponding author

†<sup>□</sup> Equally contributed

**KEYWORDS:** Cellulose Nanofiber; Polyimide; Hybrid separator; Thermal Stability; Lithium-ion Battery

**Table S1.** Physical properties of PI/DBDPE/CNF, PI/DBDPE, PI, and PP separators

| Separator    | Porosity (%) | Pore size (nm) | Electrolyte uptake (%) |
|--------------|--------------|----------------|------------------------|
| PI/DBDPE/CNF | 81           | 24             | 192                    |
| PI/DBDPE     | 89           | 96             | 190                    |
| PI           | 78           | 36             | 102                    |
| PP           | 38           | 47             | 74                     |

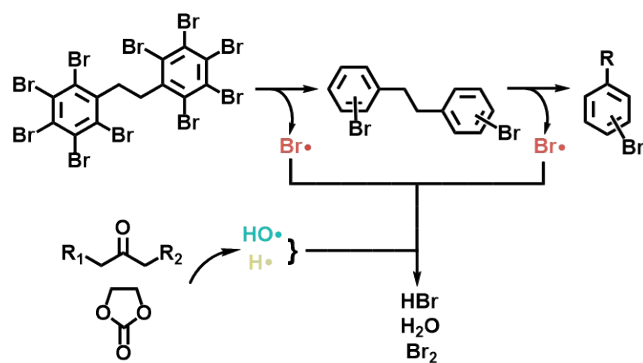

**Figure S1.** The flame-retardant mechanism of DBDPE[1]

1. W. J. Liu, K. Tian, H. Jiang, H. Q. Yu. Lab-Scale Thermal Analysis of Electronic Waste Plastics. *J Hazard Mater.* **310**(217-225 (2016). <https://doi.org/10.1016/j.jhazmat.2016.02.044>
